# Supplementary material
Source: Springer Nature journal article supplement (https://www.springermedizin.de/resource/supplementary/13256_2010_1611_MOESM1_ESM.pdf/9648078)

TEE  
S7-2omni  
70Hz  
8cm

2D  
H3  
Gn 48  
232dB/C3  
K/2/0

Pat. T: 37.0 °C  
TEE T: 37.4 °C

0 159 180

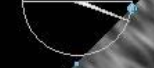

vegetation

G  
P R

Supplement: MOESM1 [file 9648078]
